# Supplementary material for: Wild-type Cu/Zn-superoxide dismutase is misfolded in cerebrospinal fluid of sporadic amyotrophic lateral sclerosis
Source: PubMed Central journal article supplement (PMC6862823; doi:10.1186/s13024-019-0341-5), 2019-11-19
Supplement: 13024_2019_341_MOESM1_ESM.pdf [file 13024_2019_341_MOESM1_ESM.pdf]

**Table S1 Primers for PCR amplification/sequencing of *SOD1* exons and a GGGGCC repeat in *C9ORF72***

|                | Primer     | Sequence (5' -> 3')                 | Primer for sequencing (5' -> 3')    |
|----------------|------------|-------------------------------------|-------------------------------------|
| Exon 1         | Ex1_fwd    | CGGAGGTCTGGCCTATAAAGTAGTCGCGGAGAC   | Ex1_rev2                            |
|                | Ex1_rev    | GATCTTCAAATAAGCTAACTGTGCACCCAAAG    | CTGACCTAGAGCGCTGAAGCCGGAAAGCGG      |
| Exon 2         | Ex2_fwd    | ATTTGGACACAGATTTTCCACTCCCAAGTCTGGC  | Ex2_rev2                            |
|                | Ex2_rev    | GTTTTCCCAGGCACAGTGGCTCACACATGTAATC  | GGGTTTTAACGTTTAGGGGC                |
| Exon 3         | Ex3_fwd    | CAGAAGTCGTGATGCAGGTCAGCACTTTCTCCATG | Ex3_fwd                             |
|                | Ex3/4_rev  | GGGACAACAGCTTCCCACAAGTTAAACAAGTC    | CAGAAGTCGTGATGCAGGTCAGCACTTTCTCCATG |
| Exon 4         | Ex3_fwd    | CAGAAGTCGTGATGCAGGTCAGCACTTTCTCCATG | Ex4_fwd                             |
|                | Ex3/4_rev  | GGGACAACAGCTTCCCACAAGTTAAACAAGTC    | GAAGCCTTGTTTGAAGAGCTGTATTTAGAATGCC  |
| Exon 5         | Ex4_fwd    | GAAGCCTTGTTTGAAGAGCTGTATTTAGAATGCC  | Ex4/5_rev                           |
|                | Ex4/5_rev  | CAGGTA CTTTAAAGCAACTCTGAAAAAGTCACAC | CAGGTA CTTTAAAGCAACTCTGAAAAAGTCACAC |
| <i>C9ORF72</i> | repeat_fwd | CCTGTAGCAAGCTCTGGA AACTCAGG         | ---                                 |
|                | repeat_rev | AGTAAAAATGCGTCGAGCTCTGAGG           | ---                                 |
