# Supplementary material for: Wild-type Cu/Zn-superoxide dismutase is misfolded in cerebrospinal fluid of sporadic amyotrophic lateral sclerosis
Source: PubMed Central journal article supplement (PMC6862823; doi:10.1186/s13024-019-0341-5), 2019-11-19

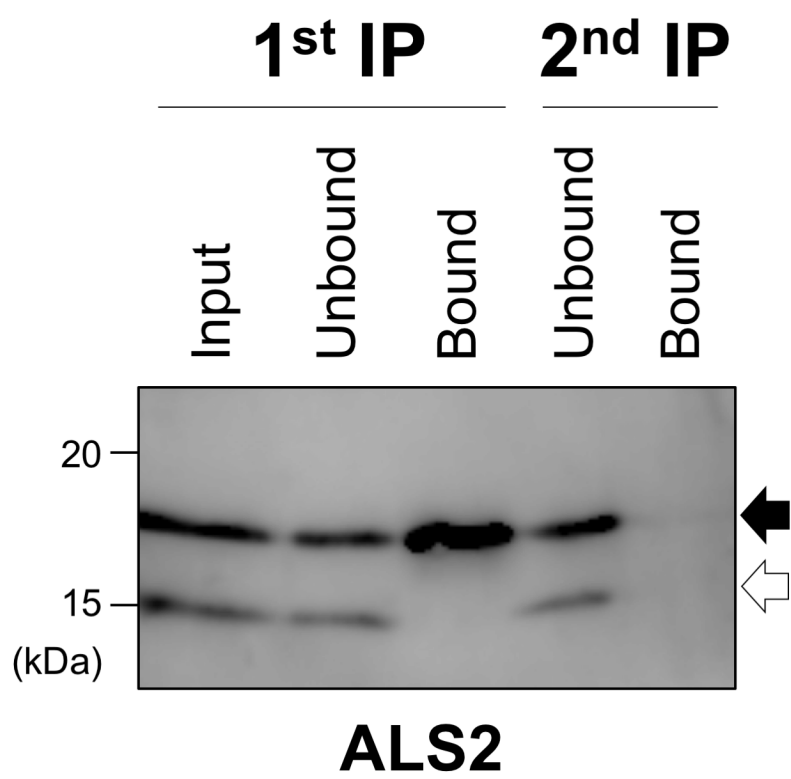

Supplement: 13024_2019_341_MOESM5_ESM.pdf [file 13024_2019_341_MOESM5_ESM.pdf]
