# Supplementary material for: Wild-type Cu/Zn-superoxide dismutase is misfolded in cerebrospinal fluid of sporadic amyotrophic lateral sclerosis
Source: PubMed Central journal article supplement (PMC6862823; doi:10.1186/s13024-019-0341-5), 2019-11-19

**(A) U $\beta$ B**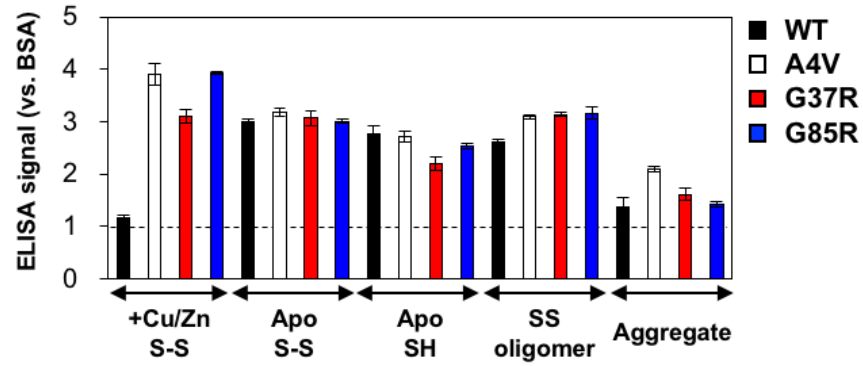**(D) apoSOD**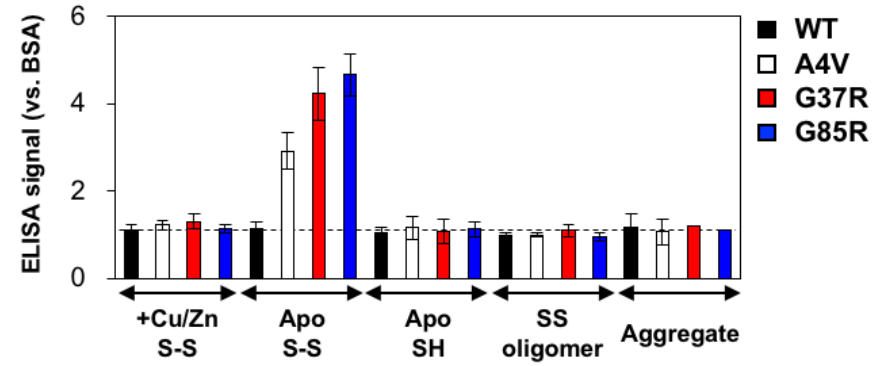**(B) EDI**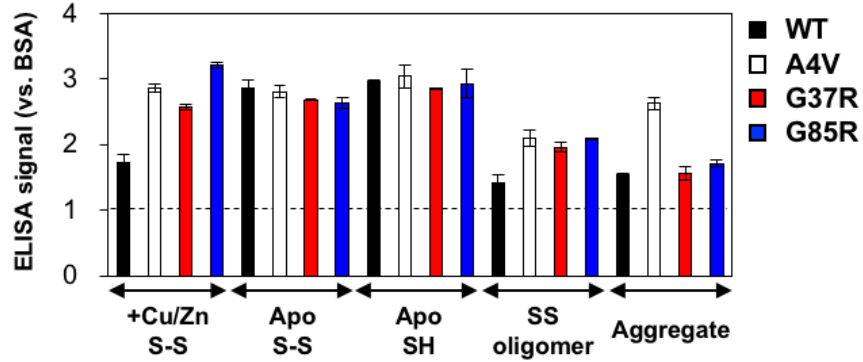**(E) 24-39**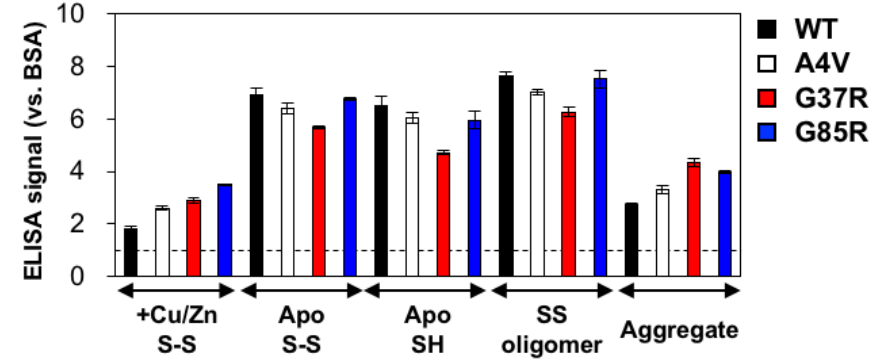**(C) SOD1<sup>int</sup>**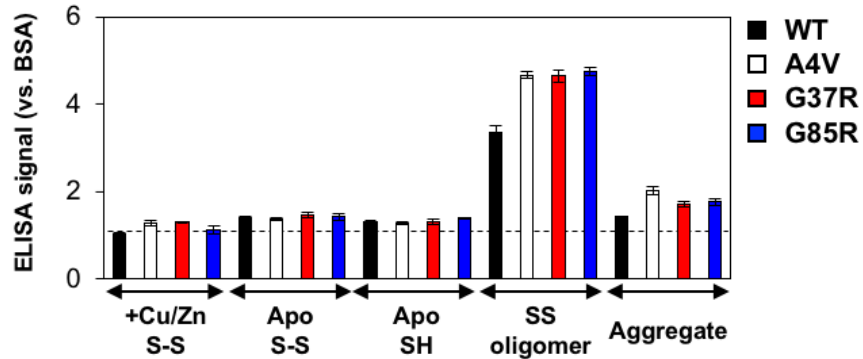**(F) Pan-SOD1**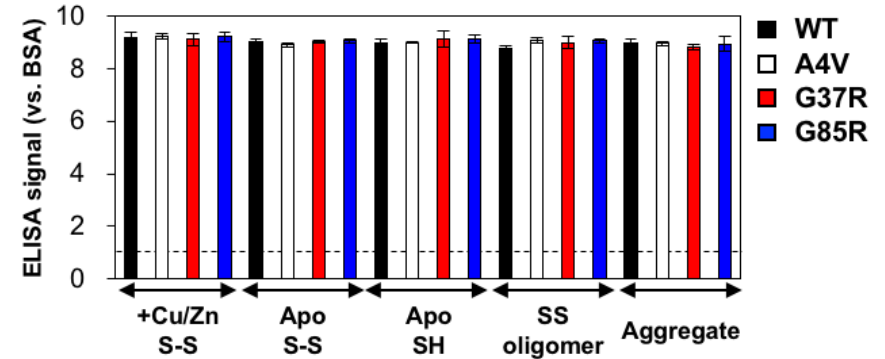

Supplement: 13024_2019_341_MOESM6_ESM.pdf [file 13024_2019_341_MOESM6_ESM.pdf]
