# Supplementary material for: Wild-type Cu/Zn-superoxide dismutase is misfolded in cerebrospinal fluid of sporadic amyotrophic lateral sclerosis
Source: Mol Neurodegener. 2019 Nov 19;14:42. doi: 10.1186/s13024-019-0341-5 (PMC6862823; doi:10.1186/s13024-019-0341-5)
Supplement: Supplementary file 9 — Additional file 9. A spreadsheet with ELISA data was available in a Microsoft Excel file. In a “Standard curve” sheet, absorbance values at 490 nm for preparation of standard curves (i.e. Additional file 3: Figure S2) were summarized. Also, absorbance values at 490 nm in the sandwich ELISA on CSF were available in a “Absorbance” sheet. As described in the Methods, furthermore, absorbance values at 490 nm measured in the ELISA were substituted into equations fitted to standard curves (Additional file 3: Figure S2), and apparent amounts of SOD1 were summarized in an “Apparent amount” sheet (i.e. Figures 3 and 6). In all sheets, averages together with standard deviations of the observed data were shown. [file 13024_2019_341_MOESM9_ESM.xlsx]

## Sheet: Standard Curve
		UbB		EDI		C4F6		apoSOD		24-39		FL-154
	SOD1 (ng)	Average	Standard deviation	Average	Standard deviation	Average	Standard deviation	Average	Standard deviation	Average	Standard deviation	Average	Standard deviation
	100	0.691667	0.00984886	0.648	0.00964365	0.665333	0.0170587	0.543	0.0156205	0.536667	0.006245	0.553	0.00472582
	50	0.499	0.0205508	0.458333	0.0125831	0.508333	0.0252389	0.423	0.0052915	0.388333	0.0145717	0.387333	0.00351188
	25	0.381667	0.0219317	0.343333	0.00305505	0.357667	0.00776745	0.283	0.0186815	0.280667	0.0121244	0.291667	0.0170587
	10	0.27	0.015308	0.235	0.005	0.196	0.00723418	0.182333	0.0135031	0.191	0.0112398	0.189	0.00450925
	5	0.190333	0.00737111	0.187667	0.00723418	0.154667	0.00802081	0.121	0.0043589	0.154333	0.00493288	0.138167	0.00482183
	2.5	0.135667	0.00953939	0.14	0.0240208	0.116	0.00750555	0.082	0.005	0.127667	0.005	0.127	0.00472582
	1	0.08	0.0080829	0.0993333	0.00971253	0.087	0.00702377	0.0513333	0.00321455	0.0946667	0.00458258	0.103333	0.00550757
	0.5	0.06	0.00585947	0.075	0.00556776	0.0546667	0.00351188	0.0366667	0.00152753	0.0636667	0.00360555	0.0863333	0.00378594
	0.1	0.029	0.00208167	0.0586667	0.00665833	0.0303333	0.00264575	0.0213333	0.00152753	0.0373333	0.00208167	0.075	0.00602771
	0.05	0.0206667	0.00754983	0.0353333	0.0051316	0.0236667	0.00152753	0.016	0.001	0.0296667	0.003	0.0523333	0.00472582
	0.01	0.0131667	0.00212132	0.0085	0.00353553	0.0173333	0.00141421	0.008	0	0.0201667	0.00494975	0.0221667	0.00212132

## Sheet: Absorbance
		C4F6		apoSOD		EDI		UbB		24-39		FL-154
		Average	Standard deviation	Average	Standard deviation	Average	Standard deviation	Average	Standard deviation	Average	Standard deviation	Average	Standard deviation
	ALS1	0.163543	0.0185342	0.180028	0.0342947	0.100349	0.0160415	0.0621331	0.0096124	0.0791579	0.00709127	0.128887	0.00328363
	ALS2	0.187577	0.0254886	0.2725	0.0219872	0.0868535	0.0116439	0.0949593	0.0160097	0.0579935	0.0100728	0.130574	0.0124596
	ALS3	0.134821	0.00968523	0.0872851	0.00948663	0.0731936	0.0116335	0.0528032	0.00708316	0.0256963	0.0114051	0.136815	0.00466768
	ALS4	0.135407	0.00705241	0.0925873	0.00935638	0.0797143	0.010389	0.0552846	0.00915702	0.0757933	0.012623	0.13144	0.00222091
	ALS5	0.133355	0.0080586	0.0825637	0.00727045	0.0619069	0.0100954	0.0481383	0.015776	0.0633062	0.00938539	0.136917	0.00831166
	ALS6	0.103167	0.00396483	0.0613419	0.01564	0.0702299	0.00706849	0.0310892	0.00945043	0.0525602	0.0166636	0.137205	0.0063848
	ALS7	0.146251	0.0286043	0.163597	0.0327582	0.0899587	0.00180481	0.0681994	0.0115028	0.133797	0.015702	0.131659	0.00501768
	ALS8	0.132183	0.0331838	0.0724642	0.00692834	0.0908662	0.00769886	0.0427826	0.0075946	0.0633537	0.0093563	0.130737	0.0129362
	ALS9	0.121339	0.0109937	0.0759668	0.0205534	0.0661805	0.00884951	0.0343047	0.00983745	0.108421	0.00938801	0.118314	0.00481876
	ALS10	0.201059	0.00865976	0.211387	0.0365928	0.150049	0.00910288	0.108004	0.00998363	0.078044	0.0161741	0.120705	0.0035738
	ALS11	0.130424	0.0071612	0.127993	0.0213191	0.0971742	0.0109229	0.0369078	0.0100584	0.168783	0.0193335	0.128456	0.00603978
	ALS12	0.138338	0.016829	0.0789468	0.00893196	0.0791579	0.00808485	0.0602833	0.00924829	0.0967505	0.00771493	0.129396	0.00591761
	ALS13	0.172629	0.0107448	0.0706854	0.0211065	0.0685173	0.00597614	0.0741827	0.0117439	0.149237	0.0128639	0.124704	0.00431673
	ALS14	0.127766	0.00204458	0.159627	0.0081147	0.0923054	0.00200833	0.0822571	0.00196655	0.0585132	0.00695657	0.142621	0.00696714
	ALS15	0.139873	0.0185521	0.15308	0.00466917	0.0960296	0.0154125	0.07086	0.0061891	0.0591424	0.00714604	0.11747	0.00184027
	ALS16	0.135236	0.00847713	0.129203	0.00702753	0.0883153	0.00280259	0.0696212	0.00148657	0.0817926	0.00576647	0.128819	0.0032314
	ALS17	0.13163	0.0120464	0.148073	0.022293	0.0901773	0.0157463	0.0991049	0.00923392	0.0773884	0.00303377	0.128819	0.0128928
	ALS18	0.128453	0.00606784	0.139069	0.00181564	0.0925714	0.00290268	0.0941497	0.00302649	0.0796897	0.00498746	0.118658	0.00252911
	ALS19	0.144218	0.00175163	0.119502	0.0120588	0.0945	0.00502759	0.106075	0.00249097	0.110177	0.00642462	0.114243	0.00932933
	ALS20	0.137795	0.00864061	0.111465	0.00793732	0.0898163	0.00407718	0.0869315	0.00854293	0.0715396	0.00455791	0.100445	0.00266115
	ALS21	0.137211	0.0052549	0.119153	0.00524131	0.0876122	0.00498209	0.0925805	0.00143816	0.0793879	0.00691637	0.103756	0.00313417
	C-1	0.0452878	0.0019538	0.0397584	0.00743535	0.03864	0.00141756	0.0193546	0.00422361	0.127274	0.0202665	0.127542	0.00167549
	C-2	0.032866	0.0140032	0.0475668	0.00856595	0.033298	0.00923869	0.0284859	0.00853147	0.0784662	0.0181706	0.1262	0.00256546
	C-3	0.0248436	0.0143784	0.0149776	0.0117898	0.0339493	0.00431596	0.00694779	0.0133305	0.0921018	0.0111746	0.1309	0.00450817
	C-4	0.0383005	0.0104833	0.0555169	0.0107385	0.0379143	0.00448604	0.0104217	0.00504031	0.116422	0.020259	0.135596	0.00198544
	C-5	0.0393357	0.0157648	0.0612581	0.0078963	0.0427571	0.0100843	0.0216374	0.00325457	0.075386	0.0120854	0.134132	0.00407627
	C-6	0.0357126	0.0101522	0.0248944	0.0120852	0.0228285	0.0114592	0.00280722	0.00445785	0.0431493	0.0137382	0.128627	0.00449905
	C-7	0.0248436	0.0101522	0.0621207	0.0129211	0.0199094	0.00373279	0.00188583	0.00375543	0.0472018	0.0162089	0.121902	0.00390457
	C-8	0.0333835	0.0124944	0.044679	0.00872448	0.0328872	0.00419593	0.0253654	0.00616042	0.0967523	0.0097651	0.142583	0.00698561
	C-9	0.0349363	0.00874915	0.0356861	0.00761566	0.0188797	0.00161898	0.00449179	0.00307681	0.0613149	0.00495134	0.127128	0.00446891
	C-10	0.0385593	0.00932711	0.0336877	0.00504274	0.0298421	0.00282173	0.0217984	0.00397126	0.0736768	0.00581438	0.120848	0.00336991
	C-11	0.0305369	0.00678299	0.0204125	0.00548183	0.0233459	0.00392178	0.00409546	0.00489704	0.0586777	0.0104098	0.132328	0.0083156
	C-12	0.0357126	0.0141673	0.0462492	0.00588412	0.026391	0.00376742	0.0198167	0.00317068	0.0771381	0.00767738	0.139545	0.00422909
	C-13	0.0509811	0.0107669	0.0345442	0.0058758	0.0166466	0.00216753	-0.0046239	0.00718521	0.0520847	0.00802615	0.127394	0.00673747
	C-14	0.0383005	0.00350081	0.0159874	0.00640158	0.0165451	0.00257668	0.00317068	0.00255628	0.0591722	0.0038935	0.131537	0.00364918
	C-15	0.0421823	0.0184103	0.0282634	0.00853034	0.0203008	0.00319181	0.00937992	0.00289803	0.0680727	0.00692971	0.150912	0.00591467
	C-16	0.0546041	0.0038297	0.0138462	0.0101543	0.0177632	0.00485311	-0.00092478	0.00594061	0.0611501	0.00747296	0.140754	0.00427275
	C-17	0.0605562	0.00941288	0.0339732	0.0107064	0.0228383	0.0027077	0.0122864	0.00629661	0.0758195	0.00655001	0.143821	0.0031316
	C-18	0.0551217	0.0135363	0.012276	0.00782469	0.0138045	0.00392808	-0.00766247	0.00363823	0.0519199	0.00361565	0.123659	0.00464235
	C-19	0.047813	0.00818324	0.0558876	0.00106601	0.0266535	0.00514392	0.0255253	0.00958276	0.0517397	0.0127023	0.141238	0.0160519
	C-20	0.0473957	0.0126447	0.0642509	0.00362046	0.036398	0.000768509	0.0587855	0.0188636	0.063598	0.0256632	0.131172	0.0125667
	C-21	0.069679	0.0129774	0.0552941	0.00200028	0.0265682	0.00887203	0.0461886	0.00665596	0.0526395	0.0126676	0.141867	0.00653805
	C-22	0.0921292	0.00646502	0.0804379	0.005483	0.0520703	0.00520088	0.082819	0.00584973	0.0652048	0.00750653	0.156966	0.0114804
	C-23	0.0471871	0.00922229	0.0483697	0.00200513	0.0247984	0.00195427	0.0219064	0.00606871	0.0501007	0.00692807	0.137464	0.00544837
	C-24	0.0955927	0.0141502	0.0577581	0.00336484	0.0360995	0.00061022	0.0159395	0.00986529	0.0703145	0.00949636	0.121735	0.00851063
	C-25	0.120296	0.0157412	0.0894846	0.00303263	0.0409185	0.0095804	0.0483157	0.0052951	0.077481	0.000441803	0.141553	0.00303353
	C-26	0.0587043	0.00262892	0.0850062	0.00187611	0.0391913	0.00706274	0.0306358	0.00928931	0.0479797	0.00524169	0.14753	0.00566212
	C-27	0.051819	0.00710925	0.0782976	0.0014421	0.0308754	0.00232526	0.043509	0.0126799	0.0660083	0.0128774	0.133689	0.00714548
	C-28	0.11533	0.00593065	0.0777581	0.00588531	0.0481682	0.00301829	0.0717691	0.00369914	0.073721	0.00969813	0.158854	0.00499352
	C-29	0.117375	0.00589886	0.07533	0.00277252	0.0493623	0.0109123	0.0791449	0.00769095	0.0721785	0.00718298	0.156652	0.00876833
	C-30	0.0966776	0.00795142	0.0821285	0.00172352	0.0522409	0.00340077	0.0750841	0.00132166	0.0798269	0.00121312	0.143126	0.00949956
	C-31	0.0670083	0.00949634	0.0689451	0.00326174	0.038381	0.00408414	0.0442272	0.0111283	0.0617984	0.0132836	0.145642	0.00680502
	C-32	0.0563675	0.00627726	0.0555099	0.00918125	0.033093	0.00712925	0.0404703	0.0053813	0.0590668	0.0143456	0.119219	0.00326902
	C-33	0.0917536	0.00270821	0.0719307	0.0017311	0.0255874	0.00721351	0.0363818	0.00612616	0.0534108	0.00241088	0.121735	0.00288301
	C-34	0.044306	0.00430266	0.0485234	0.0054903	0.0321872	0.00633416	0.0121404	0.0111823	0.0692091	0.00749087	0.119924	0.00212496
	C-35	0.0363206	0.00160867	0.0256096	0.0150783	0.0255369	0.00243802	0.0128836	0.00435526	0.0663779	0.010884	0.109496	0.00106248
	C-36	0.0376086	0.00178466	0.030616	0.00088239	0.0337833	0.00211139	0.0270061	0.00227078	0.103814	0.0134906	0.138327	0.00562211
	C-37	0.0507459	0.00248414	0.0336968	0.0104831	0.0404335	0.0218889	0.030227	0.00257482	0.0761301	0.00945333	0.117164	0.011867
	C-38	0.0401845	0.00271391	0.0348521	0.0181327	0.0404335	0.00531354	0.0327046	0.000429137	0.0720404	0.0114813	0.116857	0.0064628
	C-39	0.0370934	0.00425614	0.0219511	0.00352956	0.0311232	0.00280259	0.0384032	0.0104854	0.0692091	0.00957813	0.11195	0.00486889
	C-40	0.0388966	0.00354132	0.0284979	0.0031815	0.0359113	0.00715265	0.0361733	0.00904247	0.0651195	0.00357302	0.129125	0.00434838

## Sheet: Apparent amount
		C4F6 (ng/20 mg CSF proteins)		apoSOD (ng/20 mg CSF proteins)		EDI (ng/20 mg CSF proteins)		UbB (ng/20 mg CSF proteins)		24-39 (ng/20 mg CSF proteins)		FL-154 (ng/20 mg CSF proteins)
		Average	Standard deviation	Average	Standard deviation	Average	Standard deviation	Average	Standard deviation	Average	Standard deviation	Average	Standard deviation
	ALS1	5.60582	1.51581	12.4151	5.16006	0.970194	0.325436	0.494562	0.164267	0.730011	0.173551	2.09474	0.193041
	ALS2	8.01361	2.83627	30.1001	5.35385	0.695795	0.202667	1.30702	0.446196	0.313557	0.151337	2.26722	0.639731
	ALS3	3.39209	0.598617	2.43439	0.550454	0.475849	0.154922	0.339355	0.0966471	0.0395706	0.0344919	2.59757	0.313453
	ALS4	3.419	0.450518	2.76903	0.59428	0.571493	0.156059	0.380857	0.135006	0.671815	0.292242	2.24358	0.13634
	ALS5	3.29257	0.512714	2.14289	0.398711	0.326693	0.116558	0.302785	0.161051	0.394308	0.158439	2.62931	0.554534
	ALS6	1.7062	0.166399	1.17994	0.576687	0.426074	0.0952643	0.110658	0.0643668	0.269667	0.207942	2.63425	0.438267
	ALS7	4.35583	2.11094	10.0825	4.11443	0.736428	0.0332002	0.614042	0.201548	3.38135	1.23259	2.26706	0.307889
	ALS8	3.47622	2.28891	1.60789	0.334946	0.759277	0.136927	0.213766	0.0831529	0.395615	0.17498	2.28128	0.790975
	ALS9	2.6031	0.573257	1.90857	0.921247	0.375923	0.102338	0.13689	0.0761834	1.81266	0.446492	1.54916	0.241145
	ALS10	9.35869	1.01159	17.5881	6.20805	2.34502	0.334283	1.70548	0.33875	0.760092	0.513006	1.65866	0.177325
	ALS11	3.10858	0.443661	5.78054	2.06759	0.889216	0.235618	0.160399	0.0913605	6.59943	1.89972	2.08198	0.340599
	ALS12	3.66883	1.16198	1.95142	0.463256	0.558322	0.123451	0.461465	0.14723	1.30042	0.296581	2.13634	0.35886
	ALS13	6.36118	1.02045	1.65683	1.03846	0.401803	0.0778089	0.740696	0.248134	4.56809	1.09368	1.86572	0.227873
	ALS14	2.93882	0.120615	9.16241	1.02438	0.780464	0.0384011	0.909907	0.0497587	0.306973	0.108848	3.02215	0.541866
	ALS15	3.78722	1.29926	8.33896	0.565075	0.873773	0.318928	0.65283	0.131751	0.316909	0.114919	1.50137	0.0839687
	ALS16	3.41359	0.554969	5.73976	0.702017	0.706757	0.0507047	0.622874	0.0302025	0.795645	0.164505	2.08957	0.187828
	ALS17	3.20505	0.770914	7.89859	2.68698	0.761258	0.274529	1.40032	0.304061	0.673626	0.0747823	2.14932	0.745796
	ALS18	2.98708	0.366463	6.73825	0.193802	0.785926	0.0554037	1.23714	0.0912117	0.736484	0.136939	1.55727	0.117431
	ALS19	4.00178	0.123927	4.86019	1.07974	0.824795	0.100607	1.62138	0.0870821	1.87867	0.32019	1.38655	0.421773
	ALS20	3.58075	0.585201	4.14714	0.635919	0.734884	0.0763121	1.04064	0.227345	0.5391	0.0999828	0.859432	0.0826209
	ALS21	3.53062	0.34427	4.79345	0.466001	0.695587	0.0895288	1.18989	0.041853	0.733158	0.178177	0.965583	0.101815
	C-1	0.209139	0.023112	0.438016	0.176554	0.109531	0.00888572	0.0359125	0.0162157	2.9957	1.27786	2.01398	0.0952219
	C-2	0.114251	0.107924	0.649542	0.244457	0.0851475	0.0437177	0.0907618	0.0655548	0.789142	0.568247	1.94111	0.14189
	C-3	0.0647192	0.0695188	0.0819428	0.0940579	0.0832128	0.0224403	0.0132074	0.0214556	1.1487	0.384562	2.21855	0.279876
	C-4	0.149513	0.0974297	0.919326	0.364709	0.106524	0.0298115	0.0104735	0.00573996	2.34254	1.15711	2.5068	0.130902
	C-5	0.177637	0.17784	1.11758	0.291971	0.146444	0.0732582	0.044975	0.0159146	0.658099	0.266546	2.4179	0.257577
	C-6	0.126289	0.0933985	0.187676	0.136778	0.0435345	0.0496404	0.00150428	0.00253747	0.151225	0.105243	2.08394	0.24419
	C-7	0.0554235	0.0562636	1.18578	0.461592	0.0255109	0.0103394	0.000936984	0.0018725	0.201713	0.14726	1.71907	0.191343
	C-8	0.11401	0.104957	0.56899	0.238478	0.0774953	0.0244677	0.0671341	0.028591	1.31229	0.400047	3.02448	0.519509
	C-9	0.116755	0.0769794	0.348748	0.159029	0.0219182	0.00427356	0.00190482	0.00181838	0.347499	0.0766647	1.99891	0.256612
	C-10	0.149133	0.0879052	0.299355	0.0895935	0.06169	0.0126396	0.0463117	0.0199285	0.591027	0.136049	1.66496	0.158927
	C-11	0.081402	0.0464432	0.104111	0.0560342	0.0362619	0.014285	0.00271777	0.00372256	0.324182	0.181933	2.32991	0.499195
	C-12	0.136401	0.0981717	0.599803	0.173135	0.0473834	0.0156225	0.0369659	0.0141364	0.680813	0.203758	2.78488	0.294935
	C-13	0.29898	0.162472	0.318694	0.107697	0.016687	0.00515396	7.97212e-06	1.23504e-05	0.225004	0.0923979	2.02627	0.402165
	C-14	0.137577	0.0320286	0.0661673	0.0531679	0.0165931	0.00558934	0.000987013	0.00112305	0.311959	0.0547743	2.25357	0.215099
	C-15	0.216771	0.187502	0.217892	0.119517	0.0263463	0.00953689	0.00731121	0.00487013	0.474338	0.133586	3.6928	0.532304
	C-16	0.338359	0.0619686	0.0648368	0.0660686	0.0206011	0.0116559	0.000838218	0.0017939	0.351343	0.119469	2.87224	0.316823
	C-17	0.451682	0.179442	0.330993	0.231736	0.0339439	0.00935334	0.0159555	0.0164292	0.643954	0.162934	3.09674	0.242563
	C-18	0.37235	0.239884	0.045618	0.0520611	0.0117156	0.00572313	0	0	0.213994	0.0430653	1.81182	0.233535
	C-19	0.248882	0.107778	0.89596	0.0376983	0.0489579	0.0192789	0.072367	0.0563318	0.233436	0.169142	3.00868	1.10191
	C-20	0.256211	0.161484	1.22302	0.153326	0.0956001	0.00455769	0.465746	0.305002	0.489995	0.426785	2.28922	0.819002
	C-21	0.654226	0.285224	0.875775	0.069887	0.0518262	0.0313703	0.249986	0.0773625	0.243201	0.150161	2.96314	0.501858
	C-22	1.28437	0.235021	2.01367	0.295402	0.216378	0.0466243	0.928028	0.150834	0.419014	0.133345	4.2924	1.04961
	C-23	0.243177	0.110369	0.651537	0.0599404	0.040438	0.00704263	0.0483537	0.0292669	0.197699	0.0820073	2.64295	0.383712
	C-24	1.4419	0.502945	0.966305	0.126776	0.0938259	0.00355596	0.029727	0.0284087	0.525982	0.200367	1.72968	0.431702
	C-25	2.57549	0.794192	2.54151	0.192154	0.130816	0.0605533	0.274668	0.0703288	0.67412	0.0111039	2.92456	0.220457
	C-26	0.405406	0.0470305	2.26715	0.110396	0.116384	0.0471995	0.105032	0.0701157	0.17206	0.0514996	3.40065	0.464746
	C-27	0.301347	0.097396	1.88972	0.0765482	0.066276	0.0114308	0.231469	0.143006	0.453514	0.245697	2.40229	0.472161
	C-28	2.2705	0.290417	1.87	0.312782	0.180485	0.025992	0.6688	0.0774167	0.602212	0.225901	4.42215	0.485688
	C-29	2.37428	0.310115	1.73641	0.143115	0.198709	0.0880564	0.840718	0.188792	0.559052	0.161704	4.2352	0.864614
	C-30	1.45579	0.307253	2.10067	0.098163	0.216818	0.0313918	0.73938	0.0296838	0.735158	0.0322276	3.07933	0.735155
	C-31	0.581777	0.217176	1.42842	0.150565	0.108857	0.0248858	0.235452	0.115755	0.380849	0.243239	3.25462	0.528132
	C-32	0.370569	0.108688	0.903832	0.311625	0.0804948	0.0398098	0.18464	0.0562472	0.339163	0.192363	1.58516	0.151827
	C-33	1.26427	0.0959022	1.56661	0.0835645	0.0464103	0.0293752	0.146393	0.0523219	0.230568	0.0299796	1.70701	0.14559
	C-34	0.199727	0.0480018	0.662631	0.164881	0.0750366	0.0303147	0.0217457	0.0339211	0.496455	0.145285	1.61676	0.100906
	C-35	0.119159	0.0136272	0.209331	0.244774	0.0433255	0.00943419	0.0149372	0.00932721	0.451542	0.19179	1.16744	0.0401625
	C-36	0.130283	0.0160576	0.236565	0.0151634	0.0810641	0.0116096	0.0729176	0.014075	1.61961	0.570844	2.70312	0.384666
	C-37	0.279751	0.0355059	0.317281	0.183188	0.155451	0.179135	0.0942066	0.018677	0.658603	0.229021	1.534	0.5697
	C-38	0.154726	0.0263216	0.392253	0.420282	0.123134	0.037624	0.111903	0.00335129	0.570684	0.232417	1.48618	0.288788
	C-39	0.127606	0.0385795	0.115817	0.0415974	0.0676349	0.0135415	0.17277	0.104417	0.503422	0.203419	1.27064	0.201858
	C-40	0.143096	0.0336426	0.203951	0.0496011	0.0962074	0.0447156	0.149243	0.0872935	0.409907	0.0665727	2.1107	0.2583
